# Supplementary material for: Effect of lanthanide contraction on crystal structures of Ln(iii) coordination polymers with dinuclear SBUs based on 3-(4-hydroxypyridinium-1-yl) phthalic acid and oxalic acid
Source: Royal Society of Chemistry journal article supplement (doi:10.1039/c3ce40236c), 2013-01-01
Supplement: c3ce40236c.pdf [file c3ce40236c.pdf]

*Supporting Information for the manuscript:*

**Effect of lanthanide contraction on crystal structures of Ln(III) coordination polymers with dinuclear SBUs based on 3-(4-hydroxypyridinium-1-yl) phthalic acid and oxalic acid**

Xiao-Li Sun,<sup>a</sup> Bing-Xue Shen,<sup>a</sup> Shuang-Quan Zang,<sup>a\*</sup> and Chen-Xia Du<sup>a\*</sup>

<sup>†</sup>College of Chemistry and Molecular Engineering, Zhengzhou University, Zhengzhou, 450001, P. R. China

\*To whom correspondence should be addressed. E-mail: [zangsqzg@zzu.edu.cn](mailto:zangsqzg@zzu.edu.cn); [dex@zzu.edu.cn](mailto:dex@zzu.edu.cn)

Fax: +86-371-67780136; +86-371-67763390.

## This PDF file includes Table S1–S2, and Figure S1–S8

**Table S1.** Selected Bond Distances and Angles for Compounds **1–11**.

**Table S2.** Hydrogen bonds parameters in **1**.

**Fig. S1.** Hydrogen-bonding tape in **1**.

**Fig. S2.** Views of hydrogen-bond interactions in **3**.

**Fig. S3.** Local coordination environment of **6** with 30% thermal ellipsoids.

**Fig. S4.** Local coordination environment of **8** with 30% thermal ellipsoids.

**Fig. S5.** Thermogravimetric curve of the compounds **1**, **3**, **6**, and **8**.

**Fig. S6.** Thermogravimetric curve of the compounds **2**, **4**, **5**, **7** and **9–11**.

**Fig. S7.** The simulated and experimental XRPD patterns for **1–2**.

**Fig. S8.** The simulated and experimental XRPD patterns for **3–11**.

**Table S1.** Selected Bond Distances and Angles for Compounds **1–11**.

| Compound 1 <sup>a</sup> |            |                     |            |
|-------------------------|------------|---------------------|------------|
| La(1)–O(1)              | 2.633(4)   | La(1)–O(2)#1        | 2.577(3)   |
| La(1)–O(2)              | 2.654(3)   | La(1)–O(3)#1        | 2.475(3)   |
| La(1)–O(1W)             | 2.555(4)   | La(1)–O(5)#2        | 2.452(3)   |
| La(1)–O(2W)             | 2.612(4)   | La(1)–O(7)#3        | 2.583(3)   |
| La(1)–O(6)              | 2.560(3)   | O(1)–La(1)–O(2)     | 49.16(10)  |
| O(2W)–La(1)–O(2)        | 75.65(11)  | O(7)#3–La(1)–O(2)   | 70.39(11)  |
| O(2)#1–La(1)–O(2)       | 65.72(12)  | O(6)–La(1)–O(2)     | 88.58(11)  |
| O(1W)–La(1)–O(2)        | 144.72(11) | O(3)#1–La(1)–O(2)   | 126.94(11) |
| O(5)#2–La(1)–O(2)       | 129.16(12) | O(2W)–La(1)–O(1)    | 66.12(13)  |
| O(7)#3–La(1)–O(1)       | 101.69(11) | O(2)#1–La(1)–O(1)   | 111.78(11) |
| O(6)–La(1)–O(1)         | 70.48(13)  | O(1W)–La(1)–O(1)    | 142.58(13) |
| O(3)#1–La(1)–O(1)       | 137.52(12) | O(5)#2–La(1)–O(1)   | 80.26(12)  |
| O(7)#3–La(1)–O(2W)      | 142.15(11) | O(2)#1–La(1)–O(2W)  | 81.90(12)  |
| O(6)–La(1)–O(2W)        | 133.49(13) | O(1W)–La(1)–O(2W)   | 137.46(12) |
| O(3)#1–La(1)–O(2W)      | 72.22(13)  | O(5)#2–La(1)–O(2W)  | 79.86(12)  |
| O(2)#1–La(1)–O(7)#3     | 69.37(10)  | O(6)–La(1)–O(7)#3   | 62.47(10)  |
| O(1W)–La(1)–O(7)#3      | 74.32(12)  | O(3)#1–La(1)–O(7)#3 | 116.50(11) |
| O(5)#2–La(1)–O(7)#3     | 135.44(12) | O(6)–La(1)–O(2)#1   | 130.80(10) |
| O(1W)–La(1)–O(2)#1      | 101.66(12) | O(3)#1–La(1)–O(2)#1 | 68.83(10)  |
| O(5)#2–La(1)–O(2)#1     | 151.51(11) | O(1W)–La(1)–O(6)    | 75.17(13)  |
| O(3)#1–La(1)–O(6)       | 143.32(13) | O(5)#2–La(1)–O(6)   | 77.13(11)  |
| O(3)#1–La(1)–O(1W)      | 69.97(13)  | O(5)#2–La(1)–O(1W)  | 78.05(13)  |
| O(5)#2–La(1)–O(3)#1     | 84.79(11)  |                     |            |
| Compound 2 <sup>b</sup> |            |                     |            |
| Ce(1)–O(1)              | 2.446(3)   | Ce(1)–O(3)          | 2.564(3)   |
| Ce(1)–O(4)#3            | 2.609(3)   | Ce(1)–O(3)#3        | 2.643(3)   |
| Ce(1)–O(1W)             | 2.540(4)   | Ce(1)–O(5)#1        | 2.424(3)   |
| Ce(1)–O(2W)             | 2.576(4)   | Ce(1)–O(7)#2        | 2.535(3)   |
| Ce(1)–O(6)              | 2.566(3)   | O(1)–Ce(1)–O(7)#2   | 142.83(12) |
| O(5)#1–Ce(1)–O(1)       | 84.72(11)  | O(5)#1–Ce(1)–O(1W)  | 77.63(13)  |

|                     |            |                     |            |
|---------------------|------------|---------------------|------------|
| O(5)#1–Ce(1)–O(7)#2 | 77.41(11)  | O(7)#2–Ce(1)–O(1W)  | 74.91(12)  |
| O(1W)–Ce(1)–O(3)    | 150.86(11) | O(1)–Ce(1)–O(3)     | 69.02(11)  |
| O(5)#1–Ce(1)–O(3)   | 150.86(11) | O(1W)–Ce(1)–O(3)    | 103.43(12) |
| O(7)#2–Ce(1)–O(3)   | 131.42(10) | O(5)#1–Ce(1)–O(6)   | 136.20(12) |
| O(6)–Ce(1)–O(1)     | 115.33(11) | O(7)#2–Ce(1)–O(6)   | 63.12(10)  |
| O(1W)–Ce(1)–O(6)    | 74.55(12)  | O(3)–Ce(1)–O(6)     | 69.64(10)  |
| O(5)#1–Ce(1)–O(2W)  | 79.25(12)  | O(1)–Ce(1)–O(2W)    | 72.65(13)  |
| O(7)#2–Ce(1)–O(2W)  | 133.51(12) | O(1W)–Ce(1)–O(2W)   | 136.97(13) |
| O(3)–Ce(1)–O(2W)    | 80.95(11)  | O(6)–Ce(1)–O(2W)    | 142.34(12) |
| O(5)#1–Ce(1)–O(4)#3 | 79.47(11)  | O(1)–Ce(1)–O(4)#3   | 138.13(12) |
| O(7)#2–Ce(1)–O(4)#3 | 70.10(12)  | O(1W)–Ce(1)–O(4)#3  | 141.47(13) |
| O(3)#1–Ce(1)–O(4)#3 | 111.57(11) | O(6)–Ce(1)–O(4)#3   | 102.62(11) |
| O(2W)–Ce(1)–O(4)#3  | 66.44(13)  | O(5)#1–Ce(1)–O(3)#3 | 128.61(11) |
| O(1)#1–Ce(1)–O(3)#3 | 127.63(11) | O(7)#2–Ce(1)–O(3)#3 | 88.33(11)  |
| O(3)#3–Ce(1)–O(1W)  | 145.38(12) | O(2W)–Ce(1)–O(3)#3  | 75.87(12)  |
| O(3)#3–Ce(1)–O(3)   | 65.49(11)  | O(4)#3–Ce(1)–O(3)#3 | 49.43(10)  |
| O(6)–Ce(1)–O(3)#3   | 70.85(10)  |                     |            |

Compound 3<sup>c</sup>

|                    |            |                     |            |
|--------------------|------------|---------------------|------------|
| Pr(1)–O(1)         | 2.541(3)   | Pr(1)–O(9)#2        | 2.476(3)   |
| Pr(1)–O(2)         | 2.843(3)   | Pr(1)–O(10)         | 2.483(3)   |
| Pr(1)–O(1W)        | 2.456(3)   | Pr(1)–O(3)#1        | 2.594(3)   |
| Pr(1)–O(2W)        | 2.450(3)   | Pr(1)–O(4)#1        | 2.843(3)   |
| Pr(1)–O(7)#2       | 2.457(3)   | Pr(2)–O(2)          | 2.510(3)   |
| Pr(2)–O(6)         | 2.477(3)   | Pr(2)–O(11)         | 2.562(3)   |
| Pr(2)–O(8)         | 2.482(3)   | Pr(2)–O(12)#3       | 2.537(3)   |
| Pr(2)–O(3W)        | 2.488(3)   | Pr(2)–O(13)#3       | 2.620(3)   |
| Pr(2)–O(10)        | 2.727(3)   | Pr(2)–O(14)#4       | 2.378(3)   |
| O(7)#2–Pr(1)–O(2W) | 97.06(11)  | O(7)#2–Pr(1)–O(1W)  | 131.43(11) |
| O(1W)–Pr(1)–O(2W)  | 78.12(12)  | O(7)#2–Pr(1)–O(9)#2 | 65.51(10)  |
| O(2W)–Pr(1)–O(9)#2 | 76.97(12)  | O(1W)–Pr(1)–O(9)#2  | 66.35(11)  |
| O(7)#2–Pr(1)–O(10) | 153.21(10) | O(2W)–Pr(1)–O(10)   | 90.41(11)  |
| O(10)–Pr(1)–O(1W)  | 75.26(11)  | O(9)#2–Pr(1)–O(10)  | 141.23(10) |

|                       |            |                       |            |
|-----------------------|------------|-----------------------|------------|
| O(7)#2-Pr(1)-O(4)#1   | 74.60(12)  | O(2W)-Pr(1)-O(4)#1    | 69.01(10)  |
| O(1W)-Pr(1)-O(4)#1    | 140.96(12) | O(9)#2-Pr(1)-O(4)#1   | 122.86(12) |
| O(10)-Pr(1)-O(4)#1    | 84.29(11)  | O(7)#1-Pr(1)-O(1)     | 71.20(11)  |
| O(2W)-Pr(1)-O(1)      | 151.58(11) | O(1W)-Pr(1)-O(1)      | 90.34(12)  |
| O(9)#2-Pr(1)-O(1)     | 74.62(11)  | O(10)-Pr(1)-O(1)      | 111.87(10) |
| O(4)#1-Pr(1)-O(1)     | 128.39(11) | O(7)#2-Pr(1)-O(3)#1   | 73.78(10)  |
| O(2W)-Pr(1)-O(3)#1    | 120.31(11) | O(1W)-Pr(1)-O(3)#1    | 149.50(10) |
| O(9)#2-Pr(1)-O(3)#1   | 137.71(10) | O(10)-Pr(1)-O(3)#1    | 80.23(10)  |
| O(4)#1-Pr(1)-O(3)#1   | 51.51(10)  | O(1)-Pr(1)-O(3)#1     | 82.13(11)  |
| O(7)#2-Pr(1)-O(2)#3   | 117.46(10) | O(2W)-Pr(1)-O(2)      | 143.13(10) |
| O(1W)-Pr(1)-O(2)      | 69.60(10)  | O(9)#2-Pr(1)-O(2)     | 104.71(11) |
| O(4)#1-Pr(1)-O(2)     | 130.01(9)  | O(1)-Pr(1)-O(2)       | 48.01(10)  |
| O(3)#1-Pr(1)-O(2)     | 83.75(10)  | O(10)-Pr(1)-O(2)      | 64.91(10)  |
| O(14)#4-Pr(2)-O(8)    | 91.79(11)  | O(6)-Pr(2)-O(8)       | 65.85(9)   |
| O(14)#4-Pr(2)-O(3W)   | 80.35(12)  | O(6)-Pr(2)-O(3W)      | 69.08(10)  |
| O(8)-Pr(2)-O(3W)      | 134.80(10) | O(14)#4-Pr(2)-O(2)    | 93.85(11)  |
| O(6)-Pr(2)-O(2)       | 138.64(10) | O(8)-Pr(2)-O(2)       | 155.45(10) |
| O(3W)-Pr(2)-O(6)      | 69.75(11)  | O(14)#4-Pr(2)-O(12)#3 | 80.51(10)  |
| O(6)-Pr(2)-O(12)#3    | 130.43(11) | O(8)-Pr(2)-O(12)#3    | 72.23(11)  |
| O(3W)-Pr(2)-O(12)#3   | 147.12(12) | O(2)-Pr(2)-O(12)#3    | 85.17(11)  |
| O(14)#4-Pr(2)-O(11)   | 144.23(10) | O(6)-Pr(2)-O(11)      | 68.76(10)  |
| O(8)-Pr(2)-O(11)      | 70.57(10)  | O(3W)-Pr(2)-O(11)     | 90.34(11)  |
| O(2)-Pr(2)-O(11)      | 115.28(10) | O(12)#3-Pr(2)-O(11)   | 120.24(10) |
| O(14)#4-Pr(2)-O(13)#3 | 131.03(11) | O(6)-Pr(2)-O(13)#3    | 133.26(10) |
| O(8)-Pr(2)-O(13)#3    | 74.71(9)   | O(3W)-Pr(2)-O(13)#3   | 140.91(10) |
| O(2)-Pr(2)-O(13)#3    | 83.64(10)  | O(12)#3-Pr(2)-O(13)#3 | 50.52(9)   |
| O(11)-Pr(2)-O(13)#3   | 75.37(10)  | O(14)#4-Pr(2)-O(10)   | 148.18(10) |
| O(6)-Pr(2)-O(10)      | 102.18(10) | O(8)-Pr(2)-O(10)      | 116.72(10) |
| O(3W)-Pr(2)-O(10)     | 69.64(10)  | O(2)-Pr(2)-O(10)      | 66.42(10)  |
| O(12)#3-Pr(2)-O(10)   | 119.97(9)  | O(11)-Pr(2)-O(10)     | 49.05(9)   |
| O(13)#3-Pr(2)-O(10)   | 73.72(9)   | O(14)#4-Pr(2)-O(2)    | 75.68(11)  |

Compound 4<sup>d</sup>

|                      |            |                      |            |
|----------------------|------------|----------------------|------------|
| Nd(1)–O(1)           | 2.725(3)   | Nd(2)–O(7)#3         | 2.438(3)   |
| Nd(1)–O(2)           | 2.539(3)   | Nd(2)–O(3W)          | 2.439(3)   |
| Nd(1)–O(1W)          | 2.473(3)   | Nd(2)–O(13)#4        | 2.463(3)   |
| Nd(1)–O(10)          | 2.494(3)   | Nd(2)–O(9)#3         | 2.469(3)   |
| Nd(1)–O(5)#1         | 2.372(3)   | Nd(2)–O(2W)          | 2.426(3)   |
| Nd(1)–O(6)           | 2.473(3)   | Nd(2)–O(1)           | 2.470(3)   |
| Nd(1)–O(8)           | 2.465(3)   | Nd(2)–O(11)          | 2.514(3)   |
| Nd(1)–O(4)#2         | 2.514(3)   | Nd(2)–O(12)#4        | 2.577(3)   |
| Nd(1)–O(3)#2         | 2.600(2)   | Nd(2)–O(10)          | 2.863(3)   |
| O(5)#1–Nd(1)–O(8)    | 91.64(11)  | O(5)#1–Nd(1)–O(6)    | 75.59(10)  |
| O(8)–Nd(1)–O(6)      | 66.26(9)   | O(5)#1–Nd(1)–O(1W)   | 80.47(11)  |
| O(8)–Nd(1)–O(1W)     | 135.13(9)  | O(6)–Nd(1)–O(1W)     | 69.00(10)  |
| O(5)#1–Nd(1)–O(10)   | 93.76(11)  | O(8)–Nd(1)–O(10)     | 154.90(9)  |
| O(6)–Nd(1)–O(10)     | 138.76(9)  | O(1W)–Nd(1)–O(10)    | 69.97(10)  |
| O(5)#1–Nd(1)–O(4)#2  | 80.18(10)  | O(8)–Nd(1)–O(4)#2    | 72.18(10)  |
| O(6)–Nd(1)–O(4)#2    | 130.57(11) | O(1W)–Nd(1)–O(4)#2   | 146.75(10) |
| O(10)–Nd(1)–O(4)#2   | 84.62(11)  | O(5)#1–Nd(1)–O(2)    | 144.45(10) |
| O(8)–Nd(1)–O(2)      | 70.92(10)  | O(6)–Nd(1)–O(2)      | 69.08(9)   |
| O(1W)–Nd(1)–O(2)     | 90.36(10)  | O(10)–Nd(1)–O(2)     | 115.32(10) |
| O(4)#2–Nd(1)–O(2)    | 120.53(9)  | O(5)#1–Nd(1)–O(3)#2  | 131.07(10) |
| O(8)–Nd(1)–O(3)#2    | 74.73(9)   | O(6)–Nd(1)–O(3)#2    | 133.56(9)  |
| O(1W)–Nd(1)–O(3)#2   | 140.65(10) | O(10)–Nd(1)–O(3)#2   | 83.31(9)   |
| O(4)#2–Nd(1)–O(3)#2  | 50.89(9)   | O(2)–Nd(1)–O(3)#2    | 75.22(9)   |
| O(5)#1–Nd(1)–O(1)    | 148.21(10) | O(8)–Nd(1)–O(1)      | 117.08(9)  |
| O(6)–Nd(1)–O(1)      | 102.55(10) | O(1W)–Nd(1)–O(1)     | 69.66(10)  |
| O(10)–Nd(1)–O(1)     | 66.35(10)  | O(1)–Nd(1)–O(2)      | 49.18(9)   |
| O(4)#2–Nd(1)–O(1)    | 119.85(9)  | O(3)#2–Nd(1)–O(1)    | 73.40(9)   |
| O(2W)–Nd(2)–O(7)#3   | 97.42(11)  | O(9)#3–Nd(2)–O(11)   | 75.24(10)  |
| O(2W)–Nd(2)–O(3W)    | 78.48(11)  | O(1)–Nd(2)–O(11)     | 111.17(10) |
| O(7)#3–Nd(2)–O(3W)   | 132.03(10) | O(2W)–Nd(2)–O(12)#4  | 120.13(10) |
| O(2W)–Nd(2)–O(13)#4  | 68.58(10)  | O(7)#3–Nd(2)–O(12)#4 | 73.55(9)   |
| O(7)#3–Nd(2)–O(13)#4 | 74.76(11)  | O(3W)–Nd(2)–O(12)#4  | 148.99(10) |

|                               |            |                       |            |
|-------------------------------|------------|-----------------------|------------|
| O(3W)–Nd(2)–O(13)#4           | 140.68(11) | O(13)#4–Nd(2)–O(12)#4 | 51.76(9)   |
| O(2W)–Nd(2)–O(9)#3            | 77.20(11)  | O(9)#3–Nd(2)–O(12)#4  | 137.94(9)  |
| O(7)#3–Nd(2)–O(9)#3           | 65.96(9)   | O(1)–Nd(2)–O(12)#4    | 80.32(9)   |
| O(3W)–Nd(2)–O(9)#3            | 66.56(10)  | O(11)–Nd(2)–O(12)#4   | 81.90(10)  |
| O(13)#4–Nd(2)–O(9)#3          | 123.02(11) | O(2W)–Nd(2)–O(10)     | 142.69(10) |
| O(2W)–Nd(2)–O(1)              | 90.13(10)  | O(7)#3–Nd(2)–O(10)    | 117.75(9)  |
| O(7)#3–Nd(2)–O(1)             | 153.11(9)  | O(3W)–Nd(2)–O(10)     | 69.03(10)  |
| O(3W)–Nd(2)–O(1)              | 74.74(10)  | O(13)#4–Nd(2)–O(10)   | 129.97(9)  |
| O(13)#4–Nd(2)–O(1)            | 84.22(11)  | O(9)#3–Nd(2)–O(10)    | 104.88(10) |
| O(9)#3–Nd(2)–O(1)             | 140.90(9)  | O(1)–Nd(2)–O(10)      | 64.44(9)   |
| O(2W)–Nd(2)–O(11)             | 152.44(10) | O(11)–Nd(2)–O(10)     | 47.80(9)   |
| O(7)#3–Nd(2)–O(11)            | 71.68(11)  | O(12)#4–Nd(2)–O(10)   | 83.79(9)   |
| O(3W)–Nd(2)–O(11)             | 90.12(11)  | O(9)#3–Nd(2)–O(11)    | 75.24(10)  |
| <b>Compound 5<sup>c</sup></b> |            |                       |            |
| Sm(1)–O(5)#1                  | 2.341(4)   | Sm(2)–O(2W)           | 2.390(4)   |
| Sm(1)–O(11)                   | 2.428(4)   | Sm(2)–O(7)#3          | 2.409(4)   |
| Sm(1)–O(8)                    | 2.433(4)   | Sm(2)–O(1W)           | 2.410(4)   |
| Sm(1)–O(3W)                   | 2.439(4)   | Sm(2)–O(2)            | 2.426(4)   |
| Sm(1)–O(6)                    | 2.454(4)   | Sm(2)–O(9)#3          | 2.436(4)   |
| Sm(1)–O(4)#2                  | 2.492(4)   | Sm(2)–O(13)#4         | 2.443(4)   |
| Sm(1)–O(1)                    | 2.495(4)   | Sm(2)–O(10)           | 2.467(4)   |
| Sm(1)–O(3)#2                  | 2.575(4)   | Sm(2)–O(12)#4         | 2.552(4)   |
| Sm(1)–O(2)                    | 2.784(4)   | O(6)–Sm(1)–O(1)       | 69.43(13)  |
| O(5)#1–Sm(1)–O(11)            | 92.75(15)  | O(4)#2–Sm(1)–O(1)     | 120.59(13) |
| O(5)#1–Sm(1)–O(8)             | 91.25(16)  | O(5)#1–Sm(1)–O(3)#2   | 131.95(14) |
| O(11)–Sm(1)–O(8)              | 153.97(13) | O(11)–Sm(1)–O(3)#2    | 82.36(12)  |
| O(5)#1–Sm(1)–O(3W)            | 81.17(15)  | O(8)–Sm(1)–O(3)#2     | 75.92(13)  |
| O(11)–Sm(1)–O(3W)             | 70.72(13)  | O(3W)–Sm(1)–O(3)#2    | 138.83(14) |
| O(8)–Sm(1)–O(3W)              | 135.29(13) | O(6)–Sm(1)–O(3)#2     | 134.41(12) |
| O(5)#1–Sm(1)–O(6)             | 75.25(14)  | O(4)#2–Sm(1)–O(3)#2   | 51.64(12)  |
| O(11)–Sm(1)–O(6)              | 139.13(13) | O(1)–Sm(1)–O(3)#2     | 74.80(13)  |
| O(8)–Sm(1)–O(6)               | 66.57(13)  | O(5)#1–Sm(1)–O(2)     | 148.00(15) |

|                      |            |                       |            |
|----------------------|------------|-----------------------|------------|
| O(3W)–Sm(1)–O(6)     | 68.90(13)  | O(11)–Sm(1)–O(2)      | 68.09(12)  |
| O(5)#1–Sm(1)–O(4)#2  | 80.31(14)  | O(8)–Sm(1)–O(2)       | 117.40(13) |
| O(11)–Sm(1)–O(4)#2   | 82.97(14)  | O(3W)–Sm(1)–O(2)      | 68.59(12)  |
| O(8)–Sm(1)–O(4)#2    | 72.39(14)  | O(6)–Sm(1)–O(2)       | 102.10(13) |
| O(3W)–Sm(1)–O(4)#2   | 146.85(13) | O(4)#2–Sm(1)–O(2)     | 120.14(13) |
| O(6)–Sm(1)–O(4)#2    | 131.07(15) | O(1)–Sm(1)–O(2)       | 48.91(13)  |
| O(3)#2–Sm(1)–O(2)    | 72.74(12)  | O(9)#3–Sm(2)–O(13)#4  | 123.93(16) |
| O(2W)–Sm(2)–O(7)#3   | 98.82(16)  | O(2W)–Sm(2)–O(10)     | 154.12(16) |
| O(2W)–Sm(2)–O(1W)    | 79.09(15)  | O(7)#3–Sm(2)–O(10)    | 73.70(15)  |
| O(7)#3–Sm(2)–O(1W)   | 132.80(14) | O(1W)–Sm(2)–O(10)     | 88.00(15)  |
| O(2W)–Sm(2)–O(2)     | 90.75(15)  | O(2)–Sm(2)–O(10)      | 107.26(15) |
| O(7)#3–Sm(2)–O(2)    | 152.68(14) | O(9)#3–Sm(2)–O(10)    | 76.50(15)  |
| O(1W)–Sm(2)–O(2)     | 74.04(14)  | O(13)#4–Sm(2)–O(10)   | 129.84(15) |
| O(2W)–Sm(2)–O(9)#3   | 77.80(15)  | O(2W)–Sm(2)–O(12)#4   | 120.78(14) |
| O(7)#3–Sm(2)–O(9)#3  | 66.75(14)  | O(7)#3–Sm(2)–O(12)#4  | 73.96(14)  |
| O(1W)–Sm(2)–O(9)#3   | 66.79(15)  | O(1W)–Sm(2)–O(12)#4   | 146.87(15) |
| O(2)–Sm(2)–O(9)#3    | 140.55(14) | O(2)–Sm(2)–O(12)#4    | 79.15(14)  |
| O(2W)–Sm(2)–O(13)#4  | 68.88(14)  | O(9)#3–Sm(2)–O(12)#4  | 138.93(13) |
| O(7)#3–Sm(2)–O(13)#4 | 75.23(15)  | O(13)#4–Sm(2)–O(12)#4 | 52.24(13)  |
| O(1W)–Sm(2)–O(13)#4  | 141.12(14) | O(10)–Sm(2)–O(12)#4   | 81.65(14)  |
| O(2)–Sm(2)–O(13)#4   | 84.66(15)  |                       |            |

Compound 6<sup>f</sup>

|                    |           |                    |            |
|--------------------|-----------|--------------------|------------|
| Eu(1)–O(5)#1       | 2.313(3)  | Eu(1)–O(2)         | 2.459(3)   |
| Eu(1)–O(10)        | 2.379(3)  | Eu(1)–O(4)#2       | 2.487(3)   |
| Eu(1)–O(8)         | 2.422(3)  | Eu(1)–O(3)#2       | 2.555(3)   |
| Eu(1)–O(1W)        | 2.429(3)  | Eu(1)–O(1)         | 2.852(3)   |
| Eu(1)–O(6)         | 2.448(3)  | Eu(2)–O(11)        | 2.408(4)   |
| Eu(2)–O(2W)        | 2.369(3)  | Eu(2)–O(13)#4      | 2.428(4)   |
| Eu(2)–O(7)#3       | 2.399(3)  | Eu(2)–O(9)#3       | 2.428(3)   |
| Eu(2)–O(1)         | 2.403(3)  | Eu(2)–O(12)#4      | 2.539(3)   |
| Eu(2)–O(3W)        | 2.410(3)  | O(1W)–Eu(1)–O(4)#2 | 146.97(11) |
| O(5)#1–Eu(1)–O(10) | 91.83(13) | O(6)–Eu(1)–O(4)#2  | 131.84(10) |



|                      |            |                       |            |
|----------------------|------------|-----------------------|------------|
| O(5)#1–Eu(1)–O(8)    | 90.91(12)  | O(2)–Eu(1)–O(4)#2     | 120.89(10) |
| O(10)–Eu(1)–O(8)     | 152.66(12) | O(5)#1–Eu(1)–O(3)#2   | 132.23(12) |
| O(5)#1–Eu(1)–O(1W)   | 82.21(12)  | O(10)–Eu(1)–O(3)#2    | 81.65(11)  |
| O(10)–Eu(1)–O(1W)    | 71.40(12)  | O(8)–Eu(1)–O(3)#2     | 76.45(10)  |
| O(8)–Eu(1)–O(1W)     | 135.88(11) | O(1W)–Eu(1)–O(3)#2    | 137.28(11) |
| O(5)#1–Eu(1)–O(6)    | 75.15(11)  | O(6)–Eu(1)–O(3)#2     | 135.08(10) |
| O(10)–Eu(1)–O(6)     | 139.52(11) | O(2)–Eu(1)–O(3)#2     | 75.00(11)  |
| O(8)–Eu(1)–O(6)      | 67.16(10)  | O(4)#2–Eu(1)–O(3)#2   | 51.71(10)  |
| O(1W)–Eu(1)–O(6)     | 68.96(11)  | O(5)#1–Eu(1)–O(1)     | 148.13(11) |
| O(5)#1–Eu(1)–O(2)    | 144.35(11) | O(10)–Eu(1)–O(1)      | 70.06(12)  |
| O(10)–Eu(1)–O(2)     | 117.88(12) | O(8)–Eu(1)–O(1)       | 117.38(10) |
| O(8)–Eu(1)–O(2)      | 71.93(11)  | O(1W)–Eu(1)–O(1)      | 67.43(10)  |
| O(1W)–Eu(1)–O(2)     | 88.83(11)  | O(6)–Eu(1)–O(1)       | 101.36(10) |
| O(6)–Eu(1)–O(2)      | 69.44(10)  | O(2)–Eu(1)–O(1)       | 48.21(9)   |
| O(5)#1–Eu(1)–O(4)#2  | 80.52(11)  | O(4)#2–Eu(1)–O(1)     | 120.21(9)  |
| O(10)–Eu(1)–O(4)#2   | 81.21(12)  | O(3)#2–Eu(1)–O(1)     | 72.54(10)  |
| O(8)–Eu(1)–O(4)#2    | 72.43(11)  | O(11)–Eu(2)–O(13)#4   | 130.81(11) |
| O(2W)–Eu(2)–O(7)#3   | 100.73(11) | O(2W)–Eu(2)–O(9)#3    | 78.50(11)  |
| O(2W)–Eu(2)–O(1)     | 90.74(10)  | O(7)#3–Eu(2)–O(9)#3   | 67.03(10)  |
| O(7)#3–Eu(2)–O(1)    | 152.53(11) | O(1)–Eu(2)–O(9)#3     | 140.25(11) |
| O(2W)–Eu(2)–O(3W)    | 79.34(11)  | O(3W)–Eu(2)–O(9)#3    | 67.23(11)  |
| O(7)#3–Eu(2)–O(3W)   | 133.21(11) | O(11)–Eu(2)–O(9)#3    | 77.77(12)  |
| O(1)–Eu(2)–O(3W)     | 73.23(11)  | O(13)#4–Eu(2)–O(9)#3  | 124.70(12) |
| O(2W)–Eu(2)–O(11)    | 155.42(12) | O(2W)–Eu(2)–O(12)#4   | 121.18(11) |
| O(7)#3–Eu(2)–O(11)   | 75.63(12)  | O(7)#3–Eu(2)–O(12)#4  | 74.30(10)  |
| O(1)–Eu(2)–O(11)     | 103.53(11) | O(1)–Eu(2)–O(12)#4    | 78.39(11)  |
| O(3W)–Eu(2)–O(11)    | 85.69(12)  | O(3W)–Eu(2)–O(12)#4   | 145.20(10) |
| O(2W)–Eu(2)–O(13)#4  | 69.51(11)  | O(11)–Eu(2)–O(12)#4   | 81.75(12)  |
| O(7)#3–Eu(2)–O(13)#4 | 75.97(12)  | O(13)#4–Eu(2)–O(12)#4 | 52.18(10)  |
| O(1)–Eu(2)–O(13)#4   | 85.04(12)  | O(9)#3–Eu(2)–O(12)#4  | 139.56(11) |
| O(3W)–Eu(2)–O(13)#4  | 141.62(12) |                       |            |

|                     |            |                      |            |
|---------------------|------------|----------------------|------------|
| Gd(1)–O(5)#1        | 2.319(4)   | Gd(1)–O(2)           | 2.436(4)   |
| Gd(1)–O(10)         | 2.365(4)   | Gd(1)–O(4)#2         | 2.468(4)   |
| Gd(1)–O(8)          | 2.405(4)   | Gd(1)–O(3)#2         | 2.537(3)   |
| Gd(1)–O(1W)         | 2.407(4)   | Gd(2)–O(3W)          | 2.395(4)   |
| Gd(1)–O(6)          | 2.433(4)   | Gd(2)–O(9)#3         | 2.410(4)   |
| Gd(2)–O(2W)         | 2.345(4)   | Gd(2)–O(13)#4        | 2.422(4)   |
| Gd(2)–O(1)          | 2.384(4)   | Gd(2)–O(12)#4        | 2.530(4)   |
| Gd(2)–O(7)#3        | 2.389(4)   | Gd(2)–O(11)          | 2.391(4)   |
| O(10)–Gd(1)–O(3)#2  | 80.90(13)  | O(5)#1–Gd(1)–O(10)   | 91.95(15)  |
| O(8)–Gd(1)–O(3)#2   | 77.38(12)  | O(1W)–Gd(1)–O(3)#2   | 135.62(13) |
| O(5)#1–Gd(1)–O(8)   | 90.62(14)  | O(6)–Gd(1)–O(3)#2    | 135.69(12) |
| O(10)–Gd(1)–O(8)    | 152.42(14) | O(2)–Gd(1)–O(3)#2    | 74.56(12)  |
| O(5)#1–Gd(1)–O(1W)  | 83.04(14)  | O(4)#2–Gd(1)–O(3)#2  | 52.29(12)  |
| O(10)–Gd(1)–O(1W)   | 71.78(14)  | O(8)–Gd(1)–O(6)      | 67.25(12)  |
| O(8)–Gd(1)–O(1W)    | 135.76(14) | O(1W)–Gd(1)–O(6)     | 68.87(13)  |
| O(5)#1–Gd(1)–O(6)   | 74.57(14)  | O(5)#1–Gd(1)–O(2)    | 144.47(15) |
| O(10)–Gd(1)–O(6)    | 139.56(13) | O(10)–Gd(1)–O(2)     | 117.53(14) |
| O(8)–Gd(1)–O(2)     | 72.56(13)  | O(8)–Gd(1)–O(4)#2    | 72.85(14)  |
| O(1W)–Gd(1)–O(2)    | 87.72(13)  | O(1W)–Gd(1)–O(4)#2   | 147.26(14) |
| O(6)–Gd(1)–O(2)     | 70.09(13)  | O(6)–Gd(1)–O(4)#2    | 132.25(13) |
| O(5)#1–Gd(1)–O(4)#2 | 80.84(13)  | O(2)–Gd(1)–O(4)#2    | 121.13(12) |
| O(10)–Gd(1)–O(4)#2  | 80.47(14)  | O(3W)–Gd(2)–O(9)#3   | 67.28(13)  |
| O(5)#1–Gd(1)–O(3)#2 | 133.13(13) | O(2W)–Gd(2)–O(13)#4  | 69.56(13)  |
| O(2W)–Gd(2)–O(1)    | 91.67(14)  | O(1)–Gd(2)–O(13)#4   | 85.01(14)  |
| O(2W)–Gd(2)–O(7)#3  | 100.61(14) | O(7)#3–Gd(2)–O(13)#4 | 76.65(14)  |
| O(1)–Gd(2)–O(7)#3   | 152.57(13) | O(11)–Gd(2)–O(13)#4  | 131.71(13) |
| O(2W)–Gd(2)–O(11)   | 155.85(16) | O(3W)–Gd(2)–O(13)#4  | 141.89(14) |
| O(1)–Gd(2)–O(11)    | 100.68(14) | O(9)#3–Gd(2)–O(13)#4 | 125.07(14) |
| O(7)#3–Gd(2)–O(11)  | 77.63(14)  | O(2W)–Gd(2)–O(12)#4  | 121.96(14) |
| O(2W)–Gd(2)–O(3W)   | 80.27(13)  | O(1)–Gd(2)–O(12)#4   | 77.92(13)  |
| O(1)–Gd(2)–O(3W)    | 72.84(14)  | O(7)#3–Gd(2)–O(12)#4 | 74.76(13)  |
| O(7)#3–Gd(2)–O(3W)  | 133.16(14) | O(11)–Gd(2)–O(12)#4  | 81.20(13)  |

|                     |            |                       |            |
|---------------------|------------|-----------------------|------------|
| O(11)–Gd(2)–O(3W)   | 83.65(14)  | O(3W)–Gd(2)–O(12)#4   | 143.78(13) |
| O(2W)–Gd(2)–O(9)#3  | 77.87(15)  | O(9)#3–Gd(2)–O(12)#4  | 140.11(12) |
| O(1)–Gd(2)–O(9)#3   | 139.90(12) | O(13)#4–Gd(2)–O(12)#4 | 52.86(12)  |
| O(7)#3–Gd(2)–O(9)#3 | 67.24(13)  | O(11)–Gd(2)–O(9)#3    | 79.36(15)  |

Compound 8<sup>b</sup>

|                      |            |                       |            |
|----------------------|------------|-----------------------|------------|
| Tb(1)–O(2W)          | 2.328(3)   | Tb(1)–O(1W)           | 2.388(3)   |
| Tb(1)–O(11)#1        | 2.353(3)   | Tb(1)–O(8)            | 2.394(3)   |
| Tb(1)–O(6)           | 2.366(3)   | Tb(1)–O(1)            | 2.408(4)   |
| Tb(1)–O(4)#2         | 2.369(3)   | Tb(1)–O(2)            | 2.513(3)   |
| Tb(2)–O(14)#3        | 2.304(3)   | Tb(2)–O(10)           | 2.412(3)   |
| Tb(2)–O(3)#3         | 2.343(3)   | Tb(2)–O(7)            | 2.423(3)   |
| Tb(2)–O(3W)          | 2.387(3)   | Tb(2)–O(13)#4         | 2.443(3)   |
| Tb(2)–O(9)           | 2.388(3)   | Tb(2)–O(12)#4         | 2.518(3)   |
| O(2W)–Tb(1)–O(6)     | 102.30(12) | O(2W)–Tb(1)–O(1)      | 69.46(11)  |
| O(11)#1–Tb(1)–O(6)   | 151.79(11) | O(11)#1–Tb(1)–O(1)    | 84.84(12)  |
| O(2W)–Tb(1)–O(4)#2   | 156.49(12) | O(6)–Tb(1)–O(1)       | 76.80(12)  |
| O(11)#1–Tb(1)–O(4)#2 | 98.90(12)  | O(4)#2–Tb(1)–O(1)     | 132.44(11) |
| O(6)–Tb(1)–O(4)#2    | 78.85(12)  | O(1W)–Tb(1)–O(1)      | 141.98(11) |
| O(2W)–Tb(1)–O(1W)    | 80.15(12)  | O(8)–Tb(1)–O(1)       | 125.02(13) |
| O(11)#1–Tb(1)–O(1W)  | 73.00(11)  | O(2W)–Tb(1)–O(2)      | 122.20(11) |
| O(6)–Tb(1)–O(1W)     | 133.45(10) | O(11)#1–Tb(1)–O(2)    | 77.28(11)  |
| O(4)#2–Tb(1)–O(1W)   | 82.31(12)  | O(6)–Tb(1)–O(2)       | 74.58(10)  |
| O(2W)–Tb(1)–O(8)     | 78.62(12)  | O(4)#2–Tb(1)–O(2)     | 80.99(11)  |
| O(11)#1–Tb(1)–O(8)   | 140.20(12) | O(1W)–Tb(1)–O(2)      | 142.99(11) |
| O(6)–Tb(1)–O(8)      | 67.63(10)  | O(8)–Tb(1)–O(2)       | 140.30(10) |
| O(4)#2–Tb(1)–O(8)    | 80.26(12)  | O(1)–Tb(1)–O(2)       | 53.40(11)  |
| O(1W)–Tb(1)–O(8)     | 67.44(11)  | O(2W)–Tb(1)–O(1)      | 69.46(11)  |
| O(14)#3–Tb(2)–O(3)#3 | 91.62(12)  | O(10)–Tb(2)–O(7)      | 70.67(11)  |
| O(14)#3–Tb(2)–O(3W)  | 84.05(13)  | O(14)#3–Tb(2)–O(13)#4 | 80.79(12)  |
| O(3)#3–Tb(2)–O(3W)   | 72.37(11)  | O(3)#3–Tb(2)–O(13)#4  | 79.39(12)  |
| O(14)#3–Tb(2)–O(9)   | 90.56(12)  | O(3W)–Tb(2)–O(13)#4   | 147.42(11) |
| O(3)#3–Tb(2)–O(9)    | 151.56(12) | O(9)–Tb(2)–O(13)#4    | 72.98(11)  |

|                         |            |                       |            |
|-------------------------|------------|-----------------------|------------|
| O(3W)-Tb(2)-O(9)        | 136.03(10) | O(10)-Tb(2)-O(13)#4   | 121.54(10) |
| O(14)#3-Tb(2)-O(10)     | 145.30(11) | O(7)-Tb(2)-O(13)#4    | 132.80(11) |
| O(3)#3-Tb(2)-O(10)      | 116.95(12) | O(14)#3-Tb(2)-O(12)#4 | 133.41(12) |
| O(3W)-Tb(2)-O(10)       | 86.36(12)  | O(3)#3-Tb(2)-O(12)#4  | 80.34(10)  |
| O(9)-Tb(2)-O(10)        | 73.77(11)  | O(3W)-Tb(2)-O(12)#4   | 134.34(11) |
| Compound 9 <sup>i</sup> |            |                       |            |
| Dy(1)-O(2W)             | 2.319(4)   | Dy(1)-O(1W)           | 2.385(4)   |
| Dy(1)-O(12)#1           | 2.324(4)   | Dy(1)-O(8)            | 2.388(4)   |
| Dy(1)-O(1)              | 2.348(4)   | Dy(1)-O(4)#2          | 2.391(4)   |
| Dy(1)-O(6)              | 2.362(3)   | Dy(1)-O(3)#2          | 2.503(4)   |
| Dy(2)-O(14)#3           | 2.292(4)   | Dy(2)-O(13)#5         | 2.389(3)   |
| Dy(2)-O(2)#4            | 2.324(4)   | Dy(2)-O(7)            | 2.412(4)   |
| Dy(2)-O(3W)             | 2.381(4)   | Dy(2)-O(11)           | 2.447(4)   |
| Dy(2)-O(9)              | 2.378(3)   | Dy(2)-O(10)           | 2.504(4)   |
| O(2W)-Dy(1)-O(12)#1     | 90.91(14)  | O(12)#1-Dy(1)-O(1W)   | 72.76(13)  |
| O(2W)-Dy(1)-O(1)        | 156.82(15) | O(1)-Dy(1)-O(1W)      | 81.89(13)  |
| O(12)#1-Dy(1)-O(1)      | 97.87(14)  | O(6)-Dy(1)-O(1W)      | 133.65(13) |
| O(2W)-Dy(1)-O(6)        | 102.36(14) | O(2W)-Dy(1)-O(8)      | 78.51(14)  |
| O(12)#1-Dy(1)-O(6)      | 151.74(13) | O(12)#1-Dy(1)-O(8)    | 140.02(13) |
| O(1)-Dy(1)-O(6)         | 79.62(13)  | O(1)-Dy(1)-O(8)       | 81.03(14)  |
| O(2W)-Dy(1)-O(1W)       | 80.32(13)  | O(6)-Dy(1)-O(8)       | 67.84(12)  |
| O(1W)-Dy(1)-O(8)        | 67.51(13)  | O(6)-Dy(1)-O(4)#2     | 76.61(13)  |
| O(2W)-Dy(1)-O(4)#2      | 69.55(14)  | O(1W)-Dy(1)-O(4)#2    | 142.18(13) |
| O(12)#1-Dy(1)-O(4)#2    | 85.09(14)  | O(8)-Dy(1)-O(4)#2     | 124.97(14) |
| O(1)-Dy(1)-O(4)#2       | 132.35(14) | O(2W)-Dy(1)-O(3)#2    | 122.30(13) |
| O(12)#1-Dy(1)-O(3)#2    | 77.19(12)  | O(2)#4-Dy(2)-O(7)     | 139.66(13) |
| O(14)#3-Dy(2)-O(2)#4    | 91.79(15)  | O(3W)-Dy(2)-O(7)      | 69.07(13)  |
| O(14)#3-Dy(2)-O(3W)     | 84.78(14)  | O(9)-Dy(2)-O(7)       | 67.79(12)  |
| O(2)#4-Dy(2)-O(3W)      | 72.01(14)  | O(13)#5-Dy(2)-O(7)    | 70.94(13)  |
| O(14)#3-Dy(2)-O(9)      | 90.61(14)  | O(14)#3-Dy(2)-O(11)   | 80.97(14)  |
| O(2)#4-Dy(2)-O(9)       | 151.70(14) | O(2)#4-Dy(2)-O(11)    | 79.43(13)  |
| O(3W)-Dy(2)-O(9)        | 136.27(13) | O(3W)-Dy(2)-O(11)     | 147.55(12) |

|                       |            |                     |            |
|-----------------------|------------|---------------------|------------|
| O(14)#3–Dy(2)–O(13)#5 | 145.50(14) | O(9)–Dy(2)–O(11)    | 73.13(12)  |
| O(2)#4–Dy(2)–O(13)#5  | 116.40(13) | O(13)#5–Dy(2)–O(11) | 121.57(12) |
| O(3W)–Dy(2)–O(13)#5   | 85.62(13)  | O(7)–Dy(2)–O(11)    | 133.10(12) |
| O(9)–Dy(2)–O(13)#5    | 74.06(12)  | O(14)#3–Dy(2)–O(10) | 133.55(13) |
| O(14)#3–Dy(2)–O(7)    | 74.68(14)  | O(2)#4–Dy(2)–O(10)  | 79.98(13)  |
| O(13)#5–Dy(2)–O(10)   | 74.17(12)  | O(3W)–Dy(2)–O(10)   | 133.25(13) |
| O(7)–Dy(2)–O(10)      | 136.30(11) | O(9)–Dy(2)–O(10)    | 78.01(12)  |
| O(11)–Dy(2)–O(10)     | 52.59(12)  |                     |            |

Compound 10<sup>i</sup>

|                      |            |                      |            |
|----------------------|------------|----------------------|------------|
| Er(1)–O(11)#1        | 2.292(6)   | Er(1)–O(8)           | 2.375(5)   |
| Er(1)–O(1W)          | 2.294(6)   | Er(1)–O(4)#2         | 2.380(6)   |
| Er(1)–O(1)           | 2.330(6)   | Er(1)–O(2W)          | 2.380(5)   |
| Er(1)–O(6)           | 2.334(6)   | Er(1)–O(3)#2         | 2.495(5)   |
| Er(2)–O(14)#3        | 2.268(6)   | Er(2)–O(10)          | 2.359(6)   |
| Er(2)–O(2)#4         | 2.302(6)   | Er(2)–O(7)           | 2.400(5)   |
| Er(2)–O(9)           | 2.346(5)   | Er(2)–O(13)#5        | 2.428(5)   |
| Er(2)–O(3W)          | 2.354(5)   | Er(2)–O(12)#5        | 2.488(5)   |
| O(11)#1–Er(1)–O(1W)  | 90.9(2)    | O(1)–Er(1)–O(4)#2    | 132.75(18) |
| O(11)#1–Er(1)–O(1)   | 96.8(2)    | O(6)–Er(1)–O(4)#2    | 76.5(2)    |
| O(1W)–Er(1)–O(1)     | 156.5(2)   | O(8)–Er(1)–O(4)#2    | 125.2(2)   |
| O(11)#1–Er(1)–O(6)   | 151.28(18) | O(11)#1–Er(1)–O(2W)  | 72.91(19)  |
| O(1W)–Er(1)–O(6)     | 102.7(2)   | O(1W)–Er(1)–O(2W)    | 80.4(2)    |
| O(1)–Er(1)–O(6)      | 80.7(2)    | O(1)–Er(1)–O(2W)     | 80.80(19)  |
| O(11)#1–Er(1)–O(8)   | 140.13(19) | O(6)–Er(1)–O(2W)     | 133.86(18) |
| O(1W)–Er(1)–O(8)     | 78.4(2)    | O(8)–Er(1)–O(2W)     | 67.49(19)  |
| O(1)–Er(1)–O(8)      | 81.5(2)    | O(4)#2–Er(1)–O(2W)   | 142.41(19) |
| O(6)–Er(1)–O(8)      | 68.18(18)  | O(11)#1–Er(1)–O(3)#2 | 77.02(18)  |
| O(11)#1–Er(1)–O(4)#2 | 84.8(2)    | O(1W)–Er(1)–O(3)#2   | 122.5(2)   |
| O(1W)–Er(1)–O(4)#2   | 69.88(18)  | O(1)–Er(1)–O(3)#2    | 80.88(19)  |
| O(6)–Er(1)–O(3)#2    | 74.34(18)  | O(4)#2–Er(1)–O(3)#2  | 53.35(18)  |
| O(8)–Er(1)–O(3)#2    | 140.59(19) | O(2W)–Er(1)–O(3)#2   | 142.38(19) |
| O(14)#3–Er(2)–O(2)#4 | 92.0(2)    | O(3W)–Er(2)–O(7)     | 68.81(19)  |

|                                |            |                       |            |
|--------------------------------|------------|-----------------------|------------|
| O(14)#3–Er(2)–O(9)             | 90.3(2)    | O(10)–Er(2)–O(7)      | 71.50(18)  |
| O(2)#4–Er(2)–O(9)              | 151.31(19) | O(14)#3–Er(2)–O(13)#5 | 80.54(19)  |
| O(14)#3–Er(2)–O(3W)            | 85.6(2)    | O(2)#4–Er(2)–O(13)#5  | 78.9(2)    |
| O(2)#4–Er(2)–O(3W)             | 72.10(19)  | O(9)–Er(2)–O(13)#5    | 73.25(19)  |
| O(9)–Er(2)–O(3W)               | 136.58(18) | O(3W)–Er(2)–O(13)#5   | 147.3(2)   |
| O(14)#3–Er(2)–O(10)            | 146.34(19) | O(10)–Er(2)–O(13)#5   | 122.40(17) |
| O(2)#4–Er(2)–O(10)             | 115.0(2)   | O(7)–Er(2)–O(13)#5    | 133.8(2)   |
| O(9)–Er(2)–O(10)               | 75.63(19)  | O(14)#3–Er(2)–O(12)#5 | 133.89(19) |
| O(3W)–Er(2)–O(10)              | 84.29(19)  | O(2)#4–Er(2)–O(12)#5  | 79.53(17)  |
| O(14)#3–Er(2)–O(7)             | 74.9(2)    | O(9)–Er(2)–O(12)#5    | 78.33(17)  |
| O(2)#4–Er(2)–O(7)              | 139.47(18) | O(3W)–Er(2)–O(12)#5   | 132.13(19) |
| O(9)–Er(2)–O(7)                | 68.40(18)  | O(10)–Er(2)–O(12)#5   | 73.71(17)  |
| O(13)#5–Er(2)–O(12)#5          | 53.36(18)  | O(7)–Er(2)–O(12)#5    | 136.49(17) |
| <b>Compound 11<sup>k</sup></b> |            |                       |            |
| Yb(1)–O(1W)                    | 2.258(3)   | Yb(1)–O(2W)           | 2.337(3)   |
| Yb(1)–O(1)                     | 2.262(3)   | Yb(1)–O(13)#1         | 2.357(4)   |
| Yb(1)–O(10)                    | 2.294(3)   | Yb(1)–O(8)            | 2.359(3)   |
| Yb(1)–O(6)                     | 2.318(3)   | Yb(1)–O(12)#1         | 2.475(3)   |
| Yb(2)–O(5)#2                   | 2.238(3)   | Yb(2)–O(9)#3          | 2.331(3)   |
| Yb(2)–O(11)                    | 2.290(3)   | Yb(2)–O(7)#3          | 2.379(3)   |
| Yb(2)–O(3W)                    | 2.322(3)   | Yb(2)–O(4)#4          | 2.399(3)   |
| Yb(2)–O(2)                     | 2.328(3)   | Yb(2)–O(3)#4          | 2.468(3)   |
| O(1W)–Yb(1)–O(1)               | 90.33(12)  | O(2W)–Yb(1)–O(13)#1   | 142.06(11) |
| O(1W)–Yb(1)–O(10)              | 156.69(12) | O(1W)–Yb(1)–O(8)      | 78.46(13)  |
| O(1)–Yb(1)–O(10)               | 96.48(12)  | O(1)–Yb(1)–O(8)       | 140.13(11) |
| O(1W)–Yb(1)–O(6)               | 102.91(12) | O(10)–Yb(1)–O(8)      | 82.10(12)  |
| O(1)–Yb(1)–O(6)                | 150.92(11) | O(6)–Yb(1)–O(8)       | 68.65(11)  |
| O(10)–Yb(1)–O(6)               | 81.57(12)  | O(2W)–Yb(1)–O(8)      | 67.48(11)  |
| O(1W)–Yb(1)–O(2W)              | 79.96(12)  | O(13)#1–Yb(1)–O(8)    | 125.44(12) |
| O(1)–Yb(1)–O(2W)               | 72.94(11)  | O(1W)–Yb(1)–O(12)#1   | 123.09(12) |
| O(10)–Yb(1)–O(2W)              | 80.79(12)  | O(1)–Yb(1)–O(12)#1    | 76.78(11)  |
| O(6)–Yb(1)–O(2W)               | 134.40(11) | O(10)–Yb(1)–O(12)#1   | 80.21(12)  |

|                     |            |                       |            |
|---------------------|------------|-----------------------|------------|
| O(1W)-Yb(1)-O(13)#1 | 70.04(12)  | O(6)-Yb(1)-O(12)#1    | 74.29(11)  |
| O(1)-Yb(1)-O(13)#1  | 84.29(12)  | O(2W)-Yb(1)-O(12)#1   | 141.91(11) |
| O(10)-Yb(1)-O(13)#1 | 132.72(11) | O(13)#1-Yb(1)-O(12)#1 | 53.81(11)  |
| O(6)-Yb(1)-O(13)#1  | 76.36(12)  | O(8)-Yb(1)-O(12)#1    | 140.78(10) |
| O(5)#2-Yb(2)-O(11)  | 92.23(13)  | O(9)#3-Yb(2)-O(7)#3   | 68.52(10)  |
| O(5)#2-Yb(2)-O(3W)  | 85.56(13)  | O(5)#2-Yb(2)-O(4)#4   | 80.49(12)  |
| O(11)-Yb(2)-O(3W)   | 72.23(12)  | O(11)-Yb(2)-O(4)#4    | 78.90(12)  |
| O(5)#2-Yb(2)-O(2)   | 147.21(12) | O(3W)-Yb(2)-O(4)#4    | 147.31(11) |
| O(11)-Yb(2)-O(2)    | 113.55(12) | O(2)-Yb(2)-O(4)#4     | 122.67(10) |
| O(3W)-Yb(2)-O(2)    | 83.66(12)  | O(9)#3-Yb(2)-O(4)#4   | 73.94(11)  |
| O(5)#2-Yb(2)-O(9)#3 | 91.29(13)  | O(7)#3-Yb(2)-O(4)#4   | 134.21(11) |
| O(11)-Yb(2)-O(9)#3  | 151.62(12) | O(5)#2-Yb(2)-O(3)#4   | 134.13(12) |
| O(3W)-Yb(2)-O(9)#3  | 136.13(11) | O(11)-Yb(2)-O(3)#4    | 79.04(11)  |
| O(2)-Yb(2)-O(9)#3   | 75.73(12)  | O(3W)-Yb(2)-O(3)#4    | 131.78(11) |
| O(5)#2-Yb(2)-O(7)#3 | 75.21(12)  | O(2)-Yb(2)-O(3)#4     | 73.32(11)  |
| O(11)-Yb(2)-O(7)#3  | 139.34(11) | O(9)#3-Yb(2)-O(3)#4   | 78.37(10)  |
| O(3W)-Yb(2)-O(7)#3  | 68.40(11)  | O(7)#3-Yb(2)-O(3)#4   | 136.66(10) |
| O(2)-Yb(2)-O(7)#3   | 72.03(11)  | O(4)#4-Yb(2)-O(3)#4   | 53.66(11)  |

Symmetry codes: <sup>a</sup> #1 -x, -y, 1-z; #2 x, y, 1+z; #3 1-x, -y, 1-z. <sup>b</sup> #1 2-x, 1-y, 1-z; #2 3-x, 1-y, -z; #3 2-x, 1-y, -z. <sup>c</sup> #11 -x, 2-y, 1-z; #2 1+x, y, z; #3 1-x, 1-y, 1-z; #4 -x, 2-y, 1-z. <sup>d</sup> #11 -x, 2-y, 1-z; #2 2-x, 1-y, 1-z; #3 1+x, y, z; #4 2-x, 2-y, 1-z. <sup>e</sup> #1 1-x, 1-y, 1-z; #2 2-x, -y, 1-z; #3 1+x, y, z; #4 2-x, 1-y, 1-z. <sup>f</sup> #1 1-x, 1-y, 1-z; #2 -x, 2-y, 1-z; #3 -1+x, y, z; #4 -x, 1-y, 1-z. <sup>g</sup> #1 1-x, 2-y, 2-z; #2 2-x, 1-y, 2-z; #3 1+x, y, z; #4 2-x, 2-y, 2-z. <sup>h</sup> #1 -1+x, y, z; #2 1-x, 1-y, 1-z; #3 2-x, 1-y, 1-z; #4 3-x, -y, 1-z. <sup>i</sup> #1 1-x, 1-y, 1-z; #2 -x, 2-y, 1-z; #3 -1+x, 1+y, z; #4 1+x, y, z; #5 2-x, 1-y, 1-z; #6 -1+x, y, z. <sup>j</sup> #1 1+x, y, z; #2 2-x, -y, -z; #3 1-x, -y, -z; #4 -1+x, y, z. <sup>k</sup> #1 2-x, 1-y, 1-z; #2 3-x, 1-y, 1-z; #3 1+x, y, z; #4 2-x, 2-y, 1-z.

**Table S2:** Geometrical parameters of hydrogen bonds in compound **1** (in Å and deg).

| D–H···A              | d(D–H) | d(H···A) | d(D···A) | <DHA   | Symmetry operation for A |
|----------------------|--------|----------|----------|--------|--------------------------|
| O(1W)–H(1WA)···O(4)  | 0.720  | 2.084    | 2.722    | 148.11 | $1 - x, -y, 1 - z$       |
| O(1W)–H(1WB)···O(4W) | 0.781  | 1.942    | 2.704    | 165.10 | $x, -1 + y, z$           |
| O(2W)–H(2WA)···O(3W) | 0.850  | 2.061    | 2.856    | 154.72 | $-x, 1 - y, 1 - z$       |
| O(2W)–H(2WB)···O(7)  | 0.850  | 1.910    | 2.740    | 122.19 | $-1 + x, y, z$           |
| O(3W)–H(3WA)···O(5)  | 0.851  | 2.204    | 3.055    | 179.48 | $1 - x, 1 - y, -z$       |
| O(3W)–H(3WB)···O(4)  | 0.720  | 2.102    | 2.784    | 158.49 | $x, 1 + y, z$            |
| O(4W)–H(4WA)···O(5W) | 0.905  | 2.404    | 3.309    | 178.54 | $1 - x, 1 - y, 1 - z$    |
| O(4W)–H(4WB)···O(3W) | 0.784  | 2.193    | 2.756    | 129.16 | $x, y, 1 + z$            |
| O(5W)–H(5WB)···O(2W) | 0.850  | 2.092    | 2.941    | 176.30 | $1 - x, 1 - y, 1 - z$    |

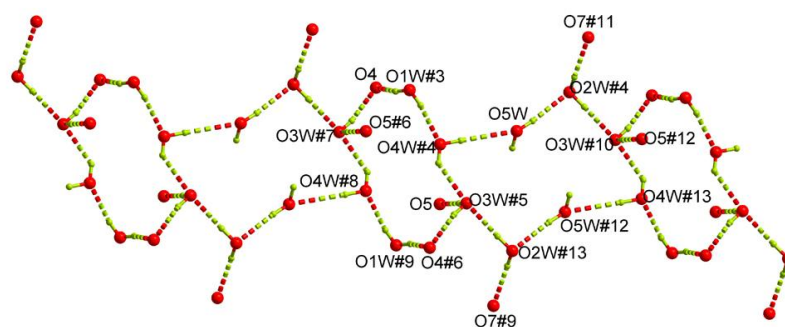

Fig. S1 Hydrogen-bonding tape in **1** with two 16-membered water rings arranged alternately which was self-assembled from  $L^{2-}$ , water, and  $OX^{2-}$ . Symmetry codes: #3  $1 - x, -y, 1 - z$ ; #4  $1 - x, 1 - y, 1 - z$ ; #5  $1 - x, 1 - y, -z$ ; #6  $1 - x, -y, -z$ ; #7  $x, -1 + y, z$ ; #8  $x, -1 + y, -1 + z$ ; #9  $x, y, -1 + z$ ; #10  $1 + x, y, z$ ; #11  $2 - x, 1 - y, 1 - z$ ; #12  $2 - x, 1 - y, -z$ .



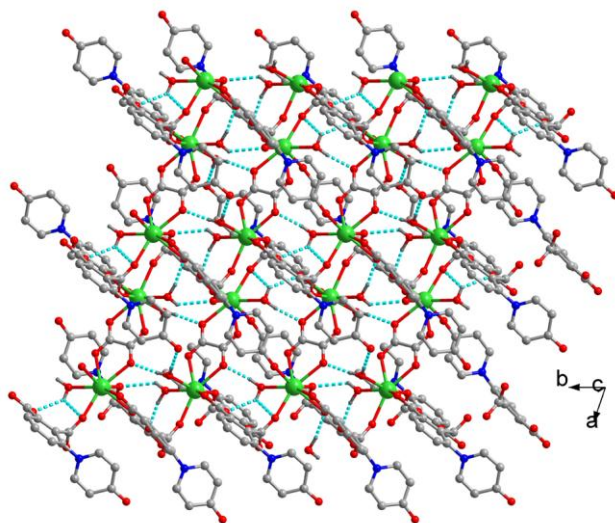

Fig. S2 Views of hydrogen-bond interactions in **3**.

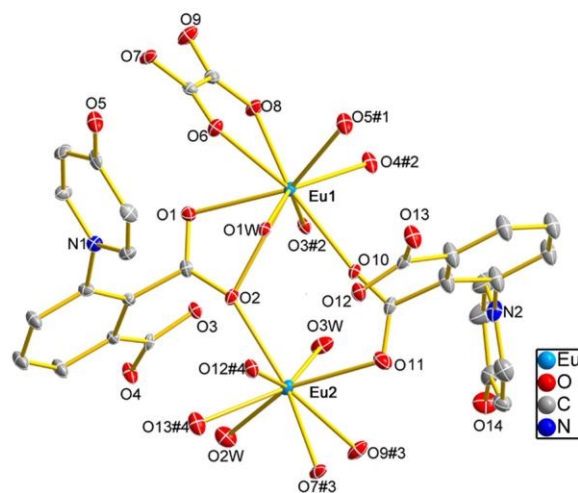

Fig. S3 Local coordination environment of **6** with 30% thermal ellipsoids.

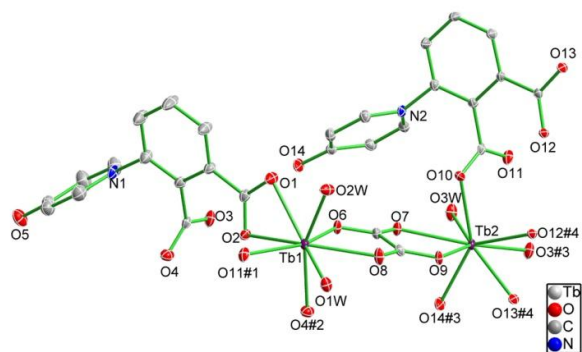

Fig. S4 Local coordination environment of **8** with 30% thermal ellipsoids.

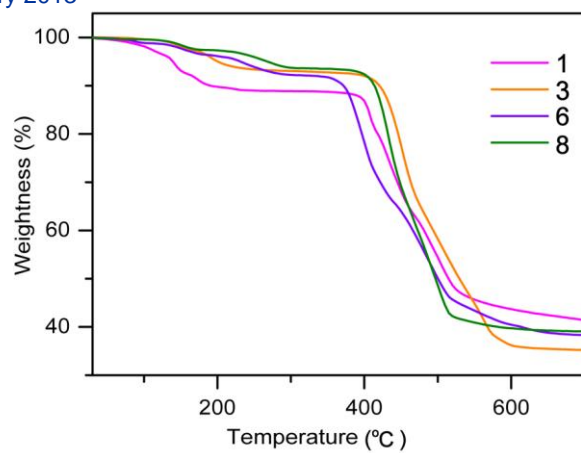

Fig. S5 Thermogravimetric curve of the compounds **1**, **3**, **6**, and **8**.

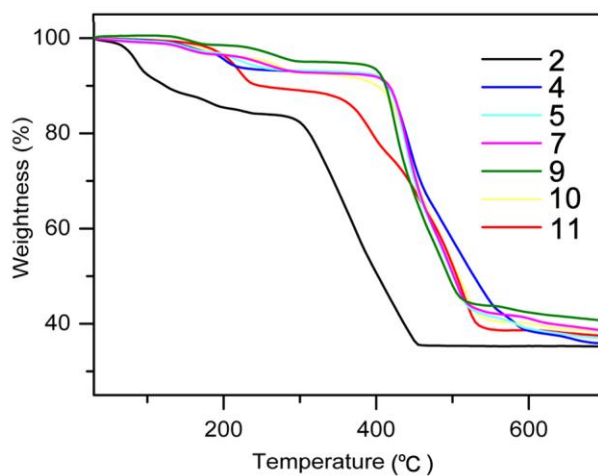

Fig. S6 Thermogravimetric curve of the compounds **2**, **4**, **5**, **7** and **9–11**.

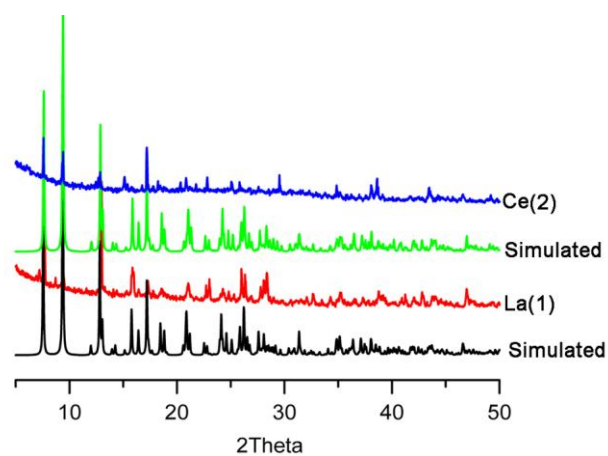

Fig. S7 The simulated and experimental XRPD patterns for **1–2**.

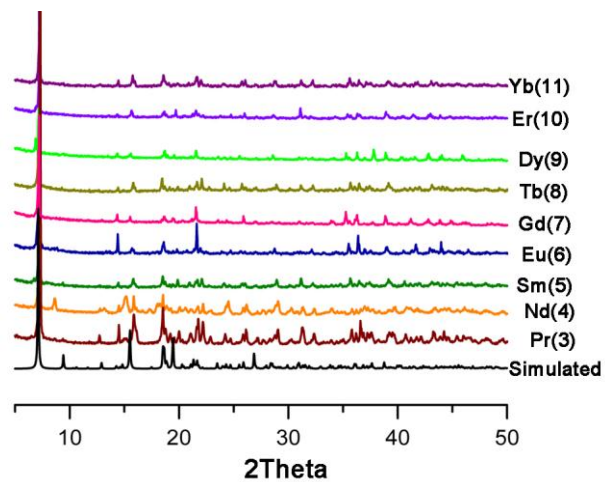

Fig. S8 The simulated and experimental XRPD patterns for **3–11**.
